# Supplementary material for: Cannabinoid use and effects in patients with epidermolysis bullosa: an international cross-sectional survey study
Source: Springer Nature journal article supplement (doi:10.1186/s13023-021-02010-0), 2021-09-06
Supplement: MOESM1 [file 13023_2021_2010_MOESM1_ESM-1.pdf]

# Stanford (US) and Groningen (NL) EB Cannabis Survey

Please complete the survey below.

Thank you!

---

Please select age of EB patient:

- Less than 7 years old  
 7-18 years old  
 Over 18 years old

---

Please read the following consent form.

[Attachment: "Cannabis Survey Consent 1-25-2020.pdf"]

---

If you agree to participate in this research, please click below.

- Yes, I agree to participate in this research study.

---

Dear Parent or Guardian: Please read the following consent form

[Attachment: "Cannabis Survey Consent 1-25-2020.pdf"]

---

Dear Parent or Guardian: If you agree to allow your child to participate in this research, please click below

- Yes, I allow my child to participate in this research study

---

Dear Patient: Please read the following assent form.

[Attachment: "Cannabis Survey Assent 1-25-2020.pdf"]

---

If you agree to participate in this research, please click below.

- Yes, I agree to participate in this research study.

**Stanford University (US) and University Medical Center Groningen (NL) EB Cannabis Survey**

**Throughout the survey, the terms "cannabis" or "cannabis products" will be used to refer to cannabis, marijuana, THC, CBD, and all cannabinoid products.**

**We will ask questions about dosage, so it may be helpful to gather the packaging for your cannabis product(s) before starting the survey.**

Who is completing this survey?

- EB patient  
 Parent / guardian / caregiver on behalf of EB patient

Age of EB patient: (select one)

- 0-6 years  
 7-12 years  
 13-17 years  
 18-25 years  
 26-34 years  
 35 years or older

Sex of EB patient

- Male  
 Female  
 Prefer not to answer  
 Other

Please describe your sex

---

---

Country:

- Prefer not to answer
- United States of America
- Afghanistan
- Åland Islands
- Albania
- Algeria
- Andorra
- Angola
- Anguilla
- Antarctica
- Antigua & Barbuda
- Argentina
- Armenia
- Aruba
- Ascension Island
- Australia
- Austria
- Azerbaijan
- Bahamas
- Bahrain
- Bangladesh
- Barbados
- Belarus
- Belgium
- Belize
- Benin
- Bermuda
- Bhutan
- Bolivia
- Bosnia & Herzegovina
- Botswana
- Brazil
- British Indian Ocean Territory
- British Virgin Islands
- Brunei
- Bulgaria
- Burkina Faso
- Burundi
- Cambodia
- Cameroon
- Canada
- Canary Islands
- Cape Verde
- Caribbean Netherlands
- Cayman Islands
- Central African Republic
- Ceuta & Melilla
- Chad
- Chile
- China
- Christmas Island
- Cocos (Keeling) Islands
- Colombia
- Comoros
- Congo - Brazzaville
- Congo - Kinshasa
- Cook Islands
- Costa Rica
- Côte d'Ivoire
- Croatia
- Cuba
- Curaçao
- Cyprus
- Czechia
- Denmark
- Diego Garcia
- Djibouti
- Dominica
- Dominican Republic

- Ecuador
- Egypt
- El Salvador
- Equatorial Guinea
- Eritrea
- Estonia
- Ethiopia
- Falkland Islands
- Faroe Islands
- Fiji
- Finland
- France
- French Guiana
- French Polynesia
- French Southern Territories
- Gabon
- Gambia
- Georgia
- Germany
- Ghana
- Gibraltar
- Greece
- Greenland
- Grenada
- Guadeloupe
- Guam
- Guatemala
- Guernsey
- Guinea
- Guinea-Bissau
- Guyana
- Haiti
- Honduras
- Hong Kong SAR China
- Hungary
- Iceland
- India
- Indonesia
- Iran
- Iraq
- Ireland
- Israel
- Italy
- Jamaica
- Japan
- Jersey
- Jordan
- Kazakhstan
- Kenya
- Kiribati
- Kosovo
- Kuwait
- Kyrgyzstan
- Laos
- Latvia
- Lebanon
- Lesotho
- Liberia
- Libya
- Liechtenstein
- Lithuania
- Luxembourg
- Macau SAR China
- Macedonia
- Madagascar
- Malawi
- Malaysia
- Maldives
- Mali
- Malta
- Marshall Islands

- Martinique
- Mauritania
- Mauritius
- Mayotte
- Mexico
- Micronesia
- Moldova
- Monaco
- Mongolia
- Montenegro
- Montserrat
- Morocco
- Mozambique
- Myanmar (Burma)
- Namibia
- Nauru
- Nepal
- Netherlands
- New Caledonia
- New Zealand
- Nicaragua
- Niger
- Nigeria
- Niue
- Norfolk Island
- North Korea
- Northern Mariana Islands
- Norway
- Oman
- Pakistan
- Palau
- Palestinian Territories
- Panama
- Papua New Guinea
- Paraguay
- Peru
- Philippines
- Pitcairn Islands
- Poland
- Portugal
- Puerto Rico
- Qatar
- Réunion
- Romania
- Russia
- Rwanda
- Samoa
- San Marino
- São Tomé & Príncipe
- Saudi Arabia
- Senegal
- Serbia
- Seychelles
- Sierra Leone
- Singapore
- Sint Maarten
- Slovakia
- Slovenia
- Solomon Islands
- Somalia
- South Africa
- South Georgia & South Sandwich Islands
- South Korea
- South Sudan
- Spain
- Sri Lanka
- St. Barthélemy
- St. Helena
- St. Kitts & Nevis
- St. Lucia
- St. Martin

- St. Pierre & Miquelon
- St. Vincent & Grenadines
- Sudan
- Suriname
- Svalbard & Jan Mayen
- Swaziland
- Sweden
- Switzerland
- Syria
- Taiwan
- Tajikistan
- Tanzania
- Thailand
- Timor-Leste
- Togo
- Tokelau
- Tonga
- Trinidad & Tobago
- Tristan da Cunha
- Tunisia
- Turkey
- Turkmenistan
- Turks & Caicos Islands
- Tuvalu
- Uganda
- Ukraine
- United Arab Emirates
- United Kingdom
- Uruguay
- Uzbekistan
- Vanuatu
- Vatican City
- Venezuela
- Vietnam
- Wallis & Futuna
- Western Sahara
- Yemen
- Zambia
- Zimbabwe

---

State

- Prefer not to answer
- Alabama
- Alaska
- Arizona
- Arkansas
- California
- Colorado
- Connecticut
- Delaware
- Florida
- Georgia
- Hawaii
- Idaho
- Illinois
- Indiana
- Iowa
- Kansas
- Kentucky
- Louisiana
- Maine
- Maryland
- Massachusetts
- Michigan
- Minnesota
- Mississippi
- Missouri
- Montana
- Nebraska
- Nevada
- New Hampshire
- New Jersey
- New Mexico
- New York
- North Carolina
- North Dakota
- Ohio
- Oklahoma
- Oregon
- Pennsylvania
- Rhode Island
- South Carolina
- South Dakota
- Tennessee
- Texas
- Utah
- Vermont
- Virginia
- Washington
- West Virginia
- Wisconsin
- Wyoming
- American Samoa
- District of Columbia
- Federated States of Micronesia
- Guam
- Marshall Islands
- Northern Mariana Islands
- Palau
- Puerto Rico
- Virgin Islands

---

Is cannabis legal where you live?

- It is legal to use medically only (prescribed by a doctor)
- It is legal to use recreationally (I can buy it at a shop / dispensary)
- It is legal to use recreationally and medically
- It is not legal
- I don't know
- Prefer not to answer
- Other

---

Please describe the legality of cannabis where you live

---

---

EB Subtype

- Recessive Dystrophic EB
- Dominant Dystrophic EB
- Junctional EB
- EB Simplex
- Kindler Syndrome
- I don't know
- Other

---

Please describe your type of EB

---

---

How severe do you consider your EB?

- Very Mild
- Mild
- Moderate
- Severe
- Very Severe

**Cannabis Use**

Do you currently use cannabis for your EB?

- Yes  
 No

Have you ever used cannabis for your EB?

- Yes  
 No

Do you have any questions or recommendations for the scientific community? Please write them in the text box.

---

Where do you get your information about medical cannabis?

---

Do you have any other comments about cannabis and EB that you would like to share? If so, please write them in the text box.

---

Click here to end the survey

- Survey end

When did you stop using cannabis?

- Less than 6 months ago  
 6 months - 1 year ago  
 1 - 5 years ago  
 Over 5 years ago

Why did you stop using cannabis? (select all that apply)

- It was too expensive  
 Because it was illegal  
 I could not use it in the workplace / at school  
 Some people around me did not like that I was using it  
 I did not like the (side) effects of using it  
 It did not help my EB  
 I found a better medication  
 I do not know  
 Other

Please describe why you stopped using cannabis

---

Why did you decide to use cannabis?

---

## Type of Cannabis Products

What type(s) of cannabis products have you used?  
(select all that apply)

- Flower (e.g. marijuana, leaf, bud, weed)
- Oil or paste (e.g. vape pen cartridge, topical oil or cream)
- Edible (e.g. food, cookie, brownie)
- Pill (e.g. tablet, capsule)
- Drink (e.g. tea)
- Tincture
- Suppository
- Other / not certain

Please describe the type of cannabis product(s) you have used

\_\_\_\_\_

By what route of administration have you used cannabis? (select all that apply)

- Topical (applied to the skin). Examples: oil, cream, spray, lotion, foam, mixture
- Inhaled. Examples: smoked (in a joint, through a pipe/bong), vaporized (e-cigarette, vape pen, volcano)
- Ingested / swallowed. Examples: edibles (food, brownie, cake), drink (tea), medicine taken by mouth (pill)
- Sublingual (placed under the tongue). Examples: tincture, oil, spray
- Suppository (rectally, vaginally)
- Other

What type of topical cannabis do you use? (select all that apply)

- Oil
- Cream
- Spray
- Lotion
- Foam
- Mixture
- Other

Please describe what is in the mixture:

\_\_\_\_\_

Please describe the type of topical cannabis you use.

\_\_\_\_\_

Where do you apply topical cannabis? (select all that apply)

- To wounds
- To unwounded skin
- To painful thickened skin (keratoderma)
- Other

Please describe where you apply topical cannabis

\_\_\_\_\_

What information do you have about the contents of the topical cannabis product? (please include all information that you know)

- % THC
- % CBD
- Concentration
- Milligrams THC
- Milligrams CBD
- Ratio of THC to CBD
- Ratio of CBD to THC
- Other / Don't know

---

What is the % THC in the topical product?

\_\_\_\_\_

---

What is the % CBD in the topical product?

\_\_\_\_\_

---

What is the concentration of the topical product?

\_\_\_\_\_

---

How many milligrams of THC are in the topical product?

\_\_\_\_\_

---

How many milligrams of CBD are in the topical product?

\_\_\_\_\_

---

What is the ratio of THC to CBD in the topical product?

\_\_\_\_\_

---

What is the ratio of CBD to THC in the topical product?

\_\_\_\_\_

---

Please describe any additional information you know about the THC or CBD contents of the topical product:

\_\_\_\_\_

---

What is the brand name of the topical product?

\_\_\_\_\_

---

What is the volume (size) of the container (e.g. tube / jar) of the topical cannabis product?

\_\_\_\_\_

---

Select units for the container volume:

- milliliter (mL)
- liter (L)
- other

---

Describe "other" unit:

\_\_\_\_\_

---

How long does it take you to go through one container (e.g. tube / jar)?

\_\_\_\_\_

---

Please upload a photograph of the front label of the topical product (if able)

---

Please upload a photograph of the back label of the topical product (if able)

---

What methods do you use to inhale cannabis? (select all that apply)

- Smoked (e.g. in a joint, through a pipe / bong)
- Vaporized (e.g. e-cigarette, vape pen, volcano)
- Other

---

Please describe the method to inhale cannabis

\_\_\_\_\_

How much do you inhale in a single session, or each time you use it?  
(if you do not know, type "0") (indicate units in the next question)

---

What are the units for how much cannabis you inhale at a single time?

- milligrams  
 grams  
 ounces  
 I don't know  
 other

Please describe the units for how much cannabis you inhale at a single time

---

What information do you have about the contents of the cannabis product that you inhale? (please include all information that you know)

- % THC  
 % CBD  
 Concentration  
 Milligrams THC  
 Milligrams CBD  
 Ratio of THC to CBD  
 Ratio of CBD to THC  
 Other / Don't know

What is the % THC in the product you inhale?

---

What is the % CBD in the product you inhale?

---

What is the concentration of the product you inhale?

---

How many milligrams of THC are in the product you inhale?

---

How many milligrams of CBD are in the product you inhale?

---

What is the ratio of THC to CBD in the product you inhale?

---

What is the ratio of CBD to THC in the product you inhale?

---

Please describe any additional information you know about the THC or CBD contents of the product you inhale

---

What is the brand name of the product you inhale?

---

Please upload a photograph of the front label of the inhaled product (if able)

Please upload a photograph of the back label of the inhaled product (if able)

What types of cannabis do you ingest? (select all that apply)

- Edibles (e.g. food, brownie)  
 Drink (e.g. tea)  
 Medicine taken by mouth (e.g. pill)  
 Other

Please describe the method to ingest cannabis

\_\_\_\_\_

How much do you ingest at a single time? (indicate units in the next question)

\_\_\_\_\_

What are the units for how much cannabis you ingest at a single time?

- droplets  
 milliliters  
 milligrams  
 grams  
 ounces  
 other

Please describe the units for how much cannabis you ingest at a single time

\_\_\_\_\_

What information do you have about the contents of the cannabis product that you ingest? (please include all information that you know)

- % THC  
 % CBD  
 Concentration  
 Milligrams THC  
 Milligrams CBD  
 Ratio of THC to CBD  
 Ratio of CBD to THC  
 Other / Don't know

What is the % THC in the ingested product?

\_\_\_\_\_

What is the % CBD in the ingested product?

\_\_\_\_\_

What is the concentration of the ingested product?

\_\_\_\_\_

How many milligrams of THC are in the ingested product?

\_\_\_\_\_

How many milligrams of CBD are in the ingested product?

\_\_\_\_\_

What is the ratio of THC to CBD in the ingested product?

\_\_\_\_\_

What is the ratio of CBD to THC in the ingested product?

\_\_\_\_\_

Please describe any additional information you know about the THC or CBD contents of the ingested product

\_\_\_\_\_

What is the brand name of the product you ingest?

\_\_\_\_\_

---

Please upload a photograph of the front label of the ingested product (if able)

---

Please upload a photograph of the back label of the ingested product (if able)

---

What type of sublingual cannabis do you use? (select all that apply)

- Tincture  
 Spray  
 Oil  
 Other
- 

Please describe the type of cannabis that you use sublingually

---

How much do you use sublingually at a single time? (indicate units in the next question)

---

What are the units for how much cannabis you use sublingually at a single time?

- droplets  
 milliliters  
 milligrams  
 grams  
 ounces  
 other
- 

Please describe the units for how much cannabis you use sublingually at a single time?

---

What information do you have about the contents of the cannabis product that you use sublingually? (please include all information that you know)

- % THC  
 % CBD  
 Concentration  
 Milligrams THC  
 Milligrams CBD  
 Ratio of THC to CBD  
 Ratio of CBD to THC  
 Other / Don't know
- 

What is the % THC in the sublingual product?

---

What is the % CBD in the sublingual product?

---

What is the concentration of the sublingual product?

---

How many milligrams of THC are in the sublingual product?

---

How many milligrams of CBD are in the sublingual product?

---

What is the ratio of THC to CBD in the sublingual product?

---

What is the ratio of CBD to THC in the sublingual product?

---

---

Please describe any additional information you know about the THC or CBD contents of the sublingual product.

---

What is the brand name of the sublingual product?

---

Please upload a photograph of the front label of the sublingual product.

---

Please upload a photograph of the back label of the sublingual product.

---

Where do you use the suppository? (check all that apply)

- Rectally  
 Vaginally  
 Other
- 

Please describe where you use the suppository

---

How much do you use as a suppository at a single time? (indicate units in the next question)

---

What are the units for how much cannabis you use as a suppository at a single time?

- Droplets  
 Milliliters  
 Milligrams  
 Grams  
 Ounces  
 Other
- 

Please describe the units for how much cannabis you use as a suppository at a single time

---

What information do you have about the contents of the cannabis product that you use as a suppository? (please include all information that you know)

- % THC  
 % CBD  
 Concentration  
 Milligrams THC  
 Milligrams CBD  
 Ratio of THC to CBD  
 Ratio of CBD to THC  
 Other / Don't know
- 

What is the % THC in the suppository product?

---

What is the % CBD in the suppository product?

---

What is the concentration of the suppository product?

---

How many milligrams of THC are in the suppository product?

---

How many milligrams of CBD are in the suppository product?

\_\_\_\_\_

What is the ratio of THC to CBD in the suppository product?

\_\_\_\_\_

What is the ratio of CBD to THC in the suppository product?

\_\_\_\_\_

Please describe any additional information you know about the THC or CBD contents of the suppository product?

\_\_\_\_\_

What is the brand name of the suppository product?

\_\_\_\_\_

Please upload a photograph of the front label of the suppository product (if able)

Please upload a photograph of the back label of the suppository product (if able)

Please describe the "other" cannabis product that you use

\_\_\_\_\_

How much do you use at a single time of the "other" cannabis product?

\_\_\_\_\_

What information do you have about the contents of the "other" cannabis product? (please include all information you know)

- % THC
- % CBD
- Concentration
- Milligrams THC
- Milligrams CBD
- Ratio of THC to CBD
- Ratio of CBD to THC
- Other / Don't know

What is the % THC in the "other" product?

\_\_\_\_\_

What is the % CBD in the "other" product?

\_\_\_\_\_

What is the concentration of the "other" product?

\_\_\_\_\_

How many milligrams of THC are in the "other" product?

\_\_\_\_\_

How many milligrams of CBD are in the "other" product?

\_\_\_\_\_

What is the ratio of THC to CBD in the "other" product?

\_\_\_\_\_

---

What is the ratio of CBD to THC in the "other" product?

---

---

Please describe any additional information you know about the THC or CBD contents of the "other" product.

---

---

What is the brand name of the "other" product?

---

---

Please upload a photograph of the front label of the "other" product.

---

Please upload a photograph of the back label of the "other" product.

---

Of your methods of administration, which do you prefer?

- Topical (i.e. applied to the skin)
- Inhaled (i.e. smoked)
- Ingested (i.e. food / drink, pill)
- Sublingual (i.e. under the tongue)
- Suppository (i.e. rectal, vaginal)
- Other

---

Please specify the route that you prefer

---

---

Please include any comments on the contents of the product(s) or the route of administration that you prefer:

---

**Frequency / Duration of Use**

How long have you used cannabis? Please estimate if you are not sure.

- Less than 6 months
- 6 months to 1 year
- 1 to 5 years
- Greater than 5 years

How often do you use cannabis?

- Less than once per week
- Once per week
- Several times per week
- Once per day
- Several times per day
- Other

Please describe how often you use cannabis

\_\_\_\_\_

Approximately how old were you when you first started using cannabis for medicinal purposes?

\_\_\_\_\_

(years)

Did the amount of cannabis that you use (e.g. how much you use at a single time) change over time?

- The amount decreased
- The amount stayed the same
- The amount increased
- The amount fluctuated (sometimes increased, sometimes decreased)
- I don't know

Did your frequency of cannabis use (e.g. how often you use it) change over time?

- I used it less frequently
- It stayed the same
- I used it more frequently
- The frequency fluctuated (sometimes more, sometimes less)
- I don't know

**Procurement**

Where do you buy your cannabis product(s)? Select all that apply.

- Dispensary (e.g. at a cannabis store)
- Pharmacy (drug store)
- From a friend
- Through a social connection
- I grow it myself
- I get it from the internet
- I prefer not to answer
- Other

---

Please describe where you buy your cannabis product(s)

\_\_\_\_\_

---

How much do you spend per month on cannabis products?  
(Select currency in the next question)

- 0-50
- 50-100
- 100-200
- 200-500
- 500-1000
- 1000-2000
- 2000-5000
- More than 5000
- I don't know

---

Select your currency

- United States dollar
- British pound
- Euro
- Abkhazian apsar
- Afghan afghani
- Albanian lek
- Alderney pound
- Algerian dinar
- Angolan kwanza
- Argentine peso
- Armenian dram
- Artsakh dram
- Aruban florin
- Ascension pound
- Australian dollar
- Azerbaijani manat
- Bahamian dollar
- Bahraini dinar
- Bangladeshi taka
- Barbadian dollar
- Belarusian ruble
- Belize dollar
- Bermudian dollar
- Bhutanese ngultrum
- Bolivian boliviano
- Bosnia and Herzegovina convertible mark
- Botswana pula
- Brazilian real
- British Virgin Islands dollar
- Brunei dollar
- Bulgarian lev
- Burmese kyat
- Burundian franc
- Cambodian riel
- Canadian dollar
- Cape Verdean escudo
- Cayman Islands dollar
- Central African CFA franc
- CFP franc
- Chilean peso
- Chinese yuan
- Colombian peso
- Comorian franc
- Congolese franc
- Cook Islands dollar
- Costa Rican colón
- Croatian kuna
- Cuban convertible peso
- Cuban peso
- Czech koruna
- Danish krone
- Djiboutian franc
- Dominican peso
- Eastern Caribbean dollar
- Egyptian pound
- Eritrean nakfa
- Ethiopian birr
- Falkland Islands pound
- Faroese króna
- Fijian dollar
- Gambian dalasi
- Georgian lari
- Ghanaian cedi
- Gibraltar pound
- Guatemalan quetzal
- Guernsey pound
- Guinean franc
- Guyanese dollar
- Haitian gourde

- Honduran lempira
- Hong Kong dollar
- Hungarian forint
- Icelandic króna
- Indian rupee
- Indonesian rupiah
- Iranian rial
- Iraqi dinar
- Israeli new shekel
- Jamaican dollar
- Japanese yen
- Jersey pound
- Jordanian dinar
- Kazakhstani tenge
- Kenyan shilling
- Kiribati dollar
- Kuwaiti dinar
- Kyrgyzstani som
- Lao kip
- Lebanese pound
- Lesotho loti
- Liberian dollar
- Libyan dinar
- Macanese pataca
- Macedonian denar
- Malagasy ariary
- Malawian kwacha
- Malaysian ringgit
- Maldivian rufiyaa
- Manx pound
- Mauritanian ouguiya
- Mauritian rupee
- Mexican peso
- Micronesian dollar
- Moldovan leu
- Mongolian tögrög
- Moroccan dirham
- Mozambican metical
- Namibian dollar
- Nauruan dollar
- Nepalese rupee
- Netherlands Antillean guilder
- New Taiwan dollar
- New Zealand dollar
- Nicaraguan córdoba
- Nigerian naira
- Niue dollar
- North Korean won
- Norwegian krone
- Omani rial
- Pakistani rupee
- Palauan dollar
- Panamanian balboa
- Papua New Guinean kina
- Paraguayan guaraní
- Peruvian sol
- Philippine piso
- Pitcairn Islands dollar
- Polish zloty
- Qatari riyal
- Romanian leu
- Russian ruble
- Rwandan franc
- Sahrawi peseta
- Saint Helena pound
- Samoan tālā
- Saudi riyal
- Serbian dinar
- Seychellois rupee
- Sierra Leonean leone
- Singapore dollar

- Solomon Islands dollar
- Somali shilling
- Somaliland shilling
- South African rand
- South Georgia and the South Sandwich Islands pound
- South Korean won
- South Sudanese pound
- Sri Lankan rupee
- Sudanese pound
- Surinamese dollar
- Swazi lilangeni
- Swedish krona
- Swiss franc
- Syrian pound
- São Tomé and Príncipe dobra
- Tajikistani somoni
- Tanzanian shilling
- Thai baht
- Tongan pa'anga
- Transnistrian ruble
- Trinidad and Tobago dollar
- Tristan da Cunha pound
- Tunisian dinar
- Turkish lira
- Turkmenistan manat
- Tuvaluan dollar
- Ugandan shilling
- Ukrainian hryvnia
- United Arab Emirates dirham
- Uruguayan peso
- Uzbekistani so'm
- Vanuatu vatu
- Venezuelan bolívar
- Vietnamese đồng
- West African CFA franc
- Yemeni rial
- Zambian kwacha

---

Is your cannabis prescribed by your doctor?

- Yes
- No

---

Does your doctor know that you use cannabis?

- Yes
- No

## Effects of Cannabis

Please refer to the image below when rating your pain.

### Wong-Baker FACES™ Pain Rating Scale

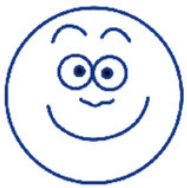

**0**

No  
Hurt

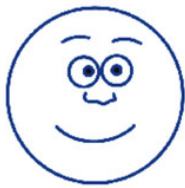

**2**

Hurts  
Little Bit

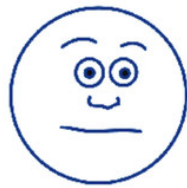

**4**

Hurts Little  
More

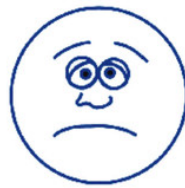

**6**

Hurts  
Even More

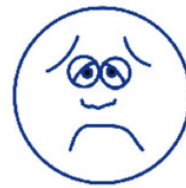

**8**

Hurts  
Whole Lot

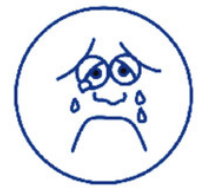

**10**

Hurts  
Worst

23 Please rate your overall average daily pain from EB prior to cannabis use:

- 0 (no pain)
- 1
- 2
- 3
- 4
- 5
- 6
- 7
- 8
- 9
- 10 (worst possible)

24 Please rate your overall average daily pain from EB after using cannabis:

- 0 (no pain)
- 1
- 2
- 3
- 4
- 5
- 6
- 7
- 8
- 9
- 10 (worst possible)

Please rate your overall average daily itch from EB prior to using cannabis:

- 0 (no itch)
- 1
- 2
- 3
- 4
- 5
- 6
- 7
- 8
- 9
- 10 (worst possible)

---

Please rate your overall average daily itch from EB after using cannabis:

- 0 (no itch)
- 1
- 2
- 3
- 4
- 5
- 6
- 7
- 8
- 9
- 10 (worst possible)

---

In general, how has cannabis affected your EB symptoms?

- Gives me great relief
- Gives me a little relief
- Makes no difference
- I feel a little worse
- I feel a lot worse

**Effects on Pain**

What effect has cannabis had on overall pain?

- Much improved
- A little improved
- No change
- A little worse
- A lot worse
- I don't have pain

What effect has cannabis had on pain from blisters or wounds?

- Much improved
- A little improved
- No change
- A little worse
- A lot worse
- I don't have pain at wounds

What effect has cannabis had on pain from thickened skin (keratoderma)?

- Much improved
- A little improved
- No change
- A little worse
- A lot worse
- I don't have pain from thickened skin / I don't have thickened skin

What effect has cannabis had on pain that is itchy?

- Much improved
- A little improved
- No change
- A little worse
- A lot worse
- I don't have pain that is itchy

What effect has cannabis had on burning pain?

- Much improved
- A little improved
- No change
- A little worse
- A lot worse
- I don't have burning pain

What effect has cannabis had on shooting pain?

- Much improved
- A little improved
- No change
- A little worse
- A lot worse
- I don't have shooting pain

What effect has cannabis had on stabbing pain?

- Much improved
- A little improved
- No change
- A little worse
- A lot worse
- I don't have stabbing pain

What effect has cannabis had on pain during dressing changes?

- Much improved
- A little improved
- No change
- A little worse
- A lot worse
- I don't have pain during dressing changes / I don't do dressing changes

---

What effect has cannabis had on pain caused by movement (e.g. walking)?

- Much improved
- A little improved
- No change
- A little worse
- A lot worse
- I don't have pain caused by movement

---

What effect has cannabis had on background pain (e.g. pain that you have all the time)?

- Much improved
- A little improved
- No change
- A little worse
- A lot worse
- I don't have background pain

---

What effect has cannabis had on eye pain?

- Much improved
- A little improved
- No change
- A little worse
- A lot worse
- I don't have eye pain

---

What effect has cannabis had on mouth / throat pain?

- Much improved
- A little improved
- No change
- A little worse
- A lot worse
- I don't have mouth / throat pain

---

What effect has cannabis had on pain when defecating/pooping?

- Much improved
- A little improved
- No change
- A little worse
- A lot worse
- I don't have pain when defecating/pooping

---

What effect has cannabis had on stomach pain?

- Much improved
- A little improved
- No change
- A little worse
- A lot worse
- I don't have stomach pain

---

What effect has cannabis had on pain due to skin cancer?

- Much improved
- A little improved
- No change
- A little worse
- A lot worse
- I don't have pain due to skin cancer / I don't have skin cancer

**Effects on Skin**

What effect has cannabis had on itchiness?

- Much improved
- A little improved
- No change
- A little worse
- A lot worse
- I don't have a problem with itching

What effect has cannabis had on wound healing time?

- Much improved
- A little improved
- No change
- A little worse
- A lot worse
- I don't have wounds

What effect has cannabis had on ease of blistering?

- Much improved
- A little improved
- No change
- A little worse
- A lot worse
- I don't blister easily

What effect has cannabis had on skin inflammation?

- Much improved
- A little improved
- No change
- A little worse
- A lot worse
- I don't have problems with skin inflammation

What effect has cannabis had on wound infections?

- Much improved
- A little improved
- No change
- A little worse
- A lot worse
- I don't get wound infections

What effect has cannabis had on growth of skin cancer?

- Much improved
- A little improved
- No change
- A little worse
- A lot worse
- I have not had skin cancer

**Non-skin effects**

What effect has cannabis had on appetite?

- Much improved
- A little improved
- No change
- A little worse
- A lot worse
- I don't have problems with my appetite

What effect has cannabis had on constipation?

- Much improved
- A little improved
- No change
- A little worse
- A lot worse
- I don't have constipation

What effect has cannabis had on your ability to move around (e.g. walk)?

- Much improved
- A little improved
- No change
- A little worse
- A lot worse
- I don't have problems moving around

What effect has cannabis had on your overall mood?

- Much improved
- A little improved
- No change
- A little worse
- A lot worse
- I don't have problems with my mood

What effect has cannabis had on anxiety?

- Much improved
- A little improved
- No change
- A little worse
- A lot worse
- I don't have problems with anxiety

What effect has cannabis had on your ability to relax?

- Much improved
- A little improved
- No change
- A little worse
- A lot worse
- I don't have problems relaxing

What effect has cannabis had on sleep?

- Much improved
- A little improved
- No change
- A little worse
- A lot worse
- I don't have problems with sleeping

What effect has cannabis had on energy levels?

- Much improved
- A little improved
- No change
- A little worse
- A lot worse
- I don't have problems with my energy levels

---

57 Please describe any other effects cannabis has had on your well being

---

**Medication-use:****Did you take any of the following medicines around the same time that you used cannabis?**

|                                                                                                                                                                                                                             | no                    | yes                   |
|-----------------------------------------------------------------------------------------------------------------------------------------------------------------------------------------------------------------------------|-----------------------|-----------------------|
| Over the counter pain medicines. Examples: acetaminophen (Tylenol), paracetamol, aspirin, ibuprofen                                                                                                                         | <input type="radio"/> | <input type="radio"/> |
| Opioid pain medicines. Examples: hydrocodone (Norco), oxycodone (Oxynorm / Oxycontin), tramadol, morphine, codeine, hydromorphone (Dilaudid)                                                                                | <input type="radio"/> | <input type="radio"/> |
| Medicines that treat burning / shooting (neuropathic) pain. Examples: gabapentin, pregabalin (Lyrica), amitriptyline (Elavil), nortriptyline (Pamelor)                                                                      | <input type="radio"/> | <input type="radio"/> |
| Anti-itch medicines. Examples: hydroxyzine (Atarax), diphenhydramine (Benadryl), loratadine (Claritin), fexofenadine (Allegra), cetirizine (Zyrtec), dimetindeen (Fenistil), promethazine (Phenergan), ondansetron (Zofran) | <input type="radio"/> | <input type="radio"/> |
| Anti-depressant medicines. Examples: duloxetine (Cymbalta), venlafaxine (Effexor), fluoxetine (Prozac), bupropion (Wellbutrin), citalopram (Celexa), escitalopram (Lexapro), mirtazapine (Remeron), sertraline (Zoloft)     | <input type="radio"/> | <input type="radio"/> |
| Benzodiazepines (anti-anxiety medicines). Examples: lorazepam (Ativan), diazepam (Valium), alprazolam (Xanax), clonazepam (Klonopin), midazolam (Versed)                                                                    | <input type="radio"/> | <input type="radio"/> |

Has your need for over the counter pain medicine changed after you started using cannabis?

- I have been able to stop using this medicine  
 A lot less needed  
 A little less needed  
 No change  
 A little more needed  
 A lot more needed  
 I don't know

---

Has your need for opioid pain medicine changed after you started using cannabis?

- I have been able to stop using this medicine
- A lot less needed
- A little less needed
- No change
- A little more needed
- A lot more needed
- I don't know

---

Has your need for medicines that treat burning / shooting pain changed after you started using cannabis?

- I have been able to stop using this medicine
- A lot less needed
- A little less needed
- No change
- A little more needed
- A lot more needed
- I don't know

---

Has your need for anti-itch medicines changed after you started using cannabis?

- I have been able to stop using this medicine
- A lot less needed
- A little less needed
- No change
- A little more needed
- A lot more needed
- I don't know

---

Has your need for anti-depressant medicines changed after you started using cannabis?

- I have been able to stop using this medicine
- A lot less needed
- A little less needed
- No change
- A little more needed
- A lot more needed
- I don't know

---

Has your need for benzodiazepines (anti-anxiety medicines) changed after you started using cannabis?

- I have been able to stop using this medicine
- A lot less needed
- A little less needed
- No change
- A little more needed
- A lot more needed
- I don't know

**Do you / have you needed the following?**

|                                         | no                    | yes                   |
|-----------------------------------------|-----------------------|-----------------------|
| Esophageal Dilations                    | <input type="radio"/> | <input type="radio"/> |
| Gastrostomy tube (G-tube)               | <input type="radio"/> | <input type="radio"/> |
| Wheelchair or walking assistance device | <input type="radio"/> | <input type="radio"/> |

---

Has your need for esophageal dilatations changed after you started using cannabis?

- I have been able to stop getting esophageal dilatations  
 A lot less needed  
 A little less needed  
 No change  
 A little more needed  
 A lot more needed  
 I don't know

---

Has your need for G tube use changed after you started using cannabis?

- I have been able to stop using my G tube  
 A lot less needed  
 A little less needed  
 No change  
 A little more needed  
 A lot more needed  
 I don't know

---

Has your need for wheelchair (or walking assistance device) use changed after you started using cannabis?

- I have been able to stop using a wheelchair / walking assistance device  
 A lot less needed  
 A little less needed  
 No change  
 A little more needed  
 A lot more needed  
 I don't know

**Cannabis side-effects: Did / do you experience these side-effects from (medical) cannabis?**

|                                  | No                    | Yes                   | I don't know          |
|----------------------------------|-----------------------|-----------------------|-----------------------|
| Paranoia                         | <input type="radio"/> | <input type="radio"/> | <input type="radio"/> |
| Dizziness / lightheadedness      | <input type="radio"/> | <input type="radio"/> | <input type="radio"/> |
| Fatigue                          | <input type="radio"/> | <input type="radio"/> | <input type="radio"/> |
| Problems with coordination       | <input type="radio"/> | <input type="radio"/> | <input type="radio"/> |
| Problems with memory / attention | <input type="radio"/> | <input type="radio"/> | <input type="radio"/> |
| Dry mouth                        | <input type="radio"/> | <input type="radio"/> | <input type="radio"/> |
| Dry / red eyes                   | <input type="radio"/> | <input type="radio"/> | <input type="radio"/> |
| Cough / wheezing                 | <input type="radio"/> | <input type="radio"/> | <input type="radio"/> |
| Nausea / vomiting                | <input type="radio"/> | <input type="radio"/> | <input type="radio"/> |
| Hallucinations / psychosis       | <input type="radio"/> | <input type="radio"/> | <input type="radio"/> |
| Other side effects               | <input type="radio"/> | <input type="radio"/> | <input type="radio"/> |

Please describe the other side effects you have experienced from cannabis:

---

Would you recommend cannabis to other EB patients?

Yes  No  I prefer not to answer

Do you have any questions or recommendations for the scientific community?

Please write them down in the text-box

---

Where do you get your information about (medicinal) cannabis?

---

Do you have any other comments about cannabis and EB that you would like to share?

If so, please write them down in the text box

---
